# Supplementary material
Source: PubMed Central journal article supplement (PMC3910984)
Supplement: EC.00268-13_zek999094231so1.pdf [file EC.00268-13_zek999094231so1.pdf]

## Supporting information

for Cabrera and González-Montelongo et al. 2013

**TABLE S1** Strains used in this work.

| Strain        | Genotype                                                           | Source                |
|---------------|--------------------------------------------------------------------|-----------------------|
| WT*           | <i>NCYC495 leu2::p18B1(LEU2)::pBSURA3(URA3)</i>                    | Laboratory collection |
| <i>ynr1</i> Δ | <i>ynr1Δ::URA3</i>                                                 | Laboratory collection |
| <i>yni1</i> Δ | <i>yni1Δ::URA3</i>                                                 | Laboratory collection |
| GPβ1          | <i>NCYC495 leu2:: pGPβ1 (P<sub>YNR1</sub>-lacZ HpLEU2)</i>         | Laboratory collection |
| EC0010        | <i>ssu1Δ::URA3</i>                                                 | This work             |
| EC0012        | <i>ssu2Δ::ble</i>                                                  | This work             |
| EC0016        | <i>ssu2Δ::ble leu2::pSSU2-LEU2</i>                                 | This work             |
| EC0014        | <i>ssu1Δ::URA3 ssu2Δ::ble</i>                                      | This work             |
| EC0034        | <i>NCYC495:: leu2::pSSU2-lacZ (P<sub>SSU2</sub>-lacZ HpLEU2)</i>   | This work             |
| EC0036        | <i>ynr1Δ::URA3 leu2::pSSU2-lacZ (P<sub>SSU2</sub>-lacZ HpLEU2)</i> | This work             |
| EC0042        | <i>ssu2Δ::ble leu2::pScSSU1 (P<sub>SSU2</sub>-ScSSU1 HpLEU2)</i>   | This work             |
| EC0044.1      | <i>NCYC495::leu2::pScSSU1(P<sub>SSU2</sub>-ScSSU1 HpLEU2)</i>      | This work             |
| EC0044.4      | <i>NCYC495::leu2::pScSSU1(P<sub>SSU2</sub>-ScSSU1 HpLEU2)</i>      | This work             |
| RG0058        | <i>nar1Δ:: URA3 leu2:: pNAR1-LEU2</i>                              | This work             |
| EC0022        | <i>ynr1Δ::URA3 ssu2Δ::ble</i>                                      | This work             |
| EC0024        | <i>ynr1Δ::URA3 leu2::pSSU2-LEU2 (nSSU2)</i>                        | This work             |
| RG0070        | <i>ynr1Δ::LEU2 nar1Δ::URA3</i>                                     | This work             |
| RG0079        | <i>ynr1Δ::URA3 nar1Δ::LEU2 ssu2Δ::ble</i>                          | This work             |

|           |                                                                              |           |
|-----------|------------------------------------------------------------------------------|-----------|
| EC0046.10 | <i>ynr1Δ::neo ssu2Δ::ble leu2:: pScSSU1 (P<sub>SSU2</sub>-ScSSU1 HpLEU2)</i> | This work |
| EC0028    | <i>yni1Δ::URA3 ssu2Δ::bleo</i>                                               | This work |
| EC0052    | <i>ssu2Δ::ble leu2:: pSSU2-LEU2(nSSU2)</i>                                   | This work |
| EC0054    | <i>NCYC495::ura3::pSSU2-URA3::ssu2Δ::ble leu2::pSSU2-LEU2(nSSU2)</i>         | This work |
| EC0032    | <i>ssu2Δ::bleo ynr1Δ::URA3 leu2::pGPβ1 (P<sub>YNR1</sub>-lacZ HpLEU2)</i>    | This work |
| RG0059    | <i>nar1Δ::URA3 (P<sub>YNR1</sub>-lacZ), LEU2</i>                             | This work |
| RG0062    | <i>NAR1-GFP (ble)</i>                                                        | This work |
| EC0040    | <i>SSU2-GFP (ble)</i>                                                        | This work |

---

All strains are derivatives of NCYC495 *leu2 ura3*. WT\* was obtained by transforming this strain with integrative vectors p18B1(*LEU2*) or pBSURA3(*URA3*) bearing *HpLEU2* and *URA3*, linearized either at *LEU2* or *URA3* to target the integration to *leu2* or *ura3* loci.

**TABLE S2** Primers used in this work.

| <b>Primer</b> | <b>5'-3' sequence</b>           | <b>Utility</b>                                      |
|---------------|---------------------------------|-----------------------------------------------------|
| SSU1-F        | TTTGACCAGCTTCTTGAGGA            | <i>SSU1</i> disruption                              |
| SSU1-R        | AAAGCCAAGTACGATGCTGA            | <i>SSU1</i> disruption                              |
| SSU1int- F    | CCACATGAGCGAAACACAAC            | <i>SSU1</i> disruption confirmation                 |
| Ura3 ext II-F | TGGATATTGGATTGCAAGCAG           | <i>SSU1</i> and <i>NAR1</i> disruption confirmation |
| SSU2-F        | TCCCTTCCTGAGTGTATGGCA           | <i>SSU2</i> disruption                              |
| SSU2-R        | TGCGGATGGTATACACGAAA            | <i>SSU2</i> disruption                              |
| SSU2int-R     | ACAATACGAGCGCAAACACTAGA         | <i>SSU2</i> disruption confirmation                 |
| ZeoC-R        | TATCGACAAAGGAAAAGGGG            | <i>SSU2</i> disruption confirmation                 |
| 334int-F      | CACATAAACGAGTACCATCCG           | <i>NAR1</i> disruption                              |
| 334int-R      | AACAGAATAAAGCGGCCAAG            | <i>NAR1</i> disruption                              |
| ext334        | TGGATATGGGAGTGCAGAAGA           | <i>NAR1</i> disruption confirmation                 |
| ScSSU1-F      | AGATCTATGGTTGCCAATTGGGTA        | Sc <i>SSU1</i> amplification                        |
| ScSSU1ter-R   | GGATCCTGCTAAACGCGTAAAATCTA      | Sc <i>SSU1</i> amplification                        |
| kanMX-F       | AGGCCTACTTGAACGGATCCACTAGCT     | <i>kanMX</i> amplification                          |
| kanMX-R       | AGGCCTTTCTTTCTGCGTTATCCCCT      | <i>kanMX</i> amplification                          |
| SSU2Prom-F    | GGATCCTCTCCCTTCTGAGTGTATGG      | <i>SSU2-lacZ</i> fusion                             |
| SSU2Prom-R    | GCATGCACGGAGGCACCGTCGTCTCGG     | <i>SSU2-lacZ</i> fusion                             |
| SSU2orf-F     | AGATCTATGGCATCTTCTCTCTCATC      | <i>SSU2-6HA</i> and <i>eGFP</i> fusion              |
| SSU2orf-R     | AGATCTGACGTCATGCTTTCGAATAG      | <i>SSU2-6HA</i> and <i>eGFP</i> fusion              |
| 3-F           | AAGCTTATGGCAGATGACACATACTAT     | <i>NAR1-6HA</i> and <i>eGFP</i> fusion              |
| 3-R           | AGATCTATTTGCGTCTCTTCTCTCGT      | <i>NAR1-6HA</i> and <i>eGFP</i> fusion              |
| tag-R         | AGAGGTCGACGTGAATGATCGTTCCACTTTT | HA fusion confirmation                              |
| G2            | ATGAACTTCAGGGTCAGCTTG           | <i>eGFP</i> fusion confirmation                     |
| proNAR1-F     | GGATCCCACAAAGAAGAGAAGAGACTG     | <i>NAR1-lacZ</i> fusion                             |
| proNAR1-R     | GCATGCAGTATGTGTCATCTGCCAT       | <i>NAR1-lacZ</i> fusion                             |
| QSSU2-F       | GCGTATTCCTTGGAGCAGAG            | qRT-PCR                                             |
| QSSU2-R       | CGTGGAAGAAGCAACTGTCA            | qRT-PCR                                             |
| Q-ACT1-F      | GAGGTTACACGTTCTCCACCA           | qRT-PCR                                             |
| Q-ACT1-R      | ACCTGTCAATCAGGCAACTC            | qRT-PCR                                             |

**TABLE S3** Plasmid used in this work.

| <b>Plasmid</b>                  | <b>Characteristic</b>                                                                                                                                                                   | <b>Origin</b>         |
|---------------------------------|-----------------------------------------------------------------------------------------------------------------------------------------------------------------------------------------|-----------------------|
| pGEM-T Easy                     | Used to clone PCR products. Amp <sup>r</sup> , <i>lacZ</i>                                                                                                                              | Promega, EEUU         |
| pBS                             | pBluescript KS(+).Amp <sup>r</sup> .                                                                                                                                                    | Stratagene, EEUU      |
| pBSURA3                         | pBluescript derivative containing the 2 kbp <i>H. polymorpha URA3</i> genomic fragment, Amp <sup>r</sup> .                                                                              | Laboratory collection |
| p18B1                           | pTZ18R derivative containing the 2.5 kbp <i>H. polymorpha LEU2</i> genomic fragment. Amp <sup>r</sup> .                                                                                 | (1)                   |
| pANL31                          | pBS derivative containing eGFP without the start codon. Amp <sup>r</sup> , Zeo <sup>r</sup> .                                                                                           | (2)                   |
| pGEM-ble                        | pGEM-T Easy derivative containing the 1312 bp fragmente of <i>ble</i> gene marker. Zeo <sup>r</sup> .                                                                                   | Laboratory collection |
| pGEM-LEU2                       | pGEM-T Easy derivative containing the 1.5 kbp <i>H. polymorpha LEU2</i> genomic fragment. Amp <sup>r</sup> .                                                                            | Laboratory collection |
| pHA1                            | pANL31 derivative replacing eGFP gene by a PCR fragment encoding for six copies of the HA epitope. Amp <sup>r</sup> , Zeo <sup>r</sup> .                                                | Laboratory collection |
| pHPI 359                        | Yep356 derivative replacing <i>S. cerevisiae URA3</i> gene by a 2.5 kbp fragment containing the <i>H. polymorpha LEU2</i> gene obtained from p18B1. Amp <sup>r</sup> , <i>LEU2</i> .    | (3)                   |
| pP <sub>SSU2</sub> -lacZ        | pHPI359 derivative expressing <i>lacZ</i> gene under control of 5' non-coding region of <i>H. polymorpha SSU2</i> gene. Amp <sup>r</sup> , <i>LEU2</i> .                                | This work             |
| pNAR1-lacZ                      | pHPI359 derivative expressing <i>lacZ</i> gene under control of 5' non-coding region of <i>H. polymorpha NAR1</i> gene. Amp <sup>r</sup> , <i>LEU2</i> .                                | This work             |
| pGEMT-P <sub>SSU21</sub>        | pGEM-T Easy derivative. It carries a 1883 bp fragment containing the <i>S. cerevisiae SSU1</i> ORF plus 503 bp corresponding to the 3' non-coding region. Amp <sup>r</sup> .            | This work             |
| pP <sub>SSU21</sub> -ScSSU1     | pGEMT-P <sub>SSU21</sub> derivative expressing <i>S. cerevisiae SSU1</i> gene under control of 5' non-coding region of <i>H. polymorpha SSU2</i> gene. Amp <sup>r</sup> , <i>LEU2</i> . | This work             |
| pP <sub>SSU21</sub> -ScSSU1LEU2 | pP <sub>SSU21</sub> -ScSSU1 derivative containing <i>H. polymorpha LEU2</i> gene. Amp <sup>r</sup> .                                                                                    | This work             |
| pSSU2-GFP                       | pANL31 derivative. pANL31 with 1182 kbp fragment containing the <i>SSU2</i> gene lacking stop codon fused in frame to the <i>eGFP</i> gene. Amp <sup>r</sup> , Zeo <sup>r</sup> .       | This work             |
| pNAR1-GFP                       | pANL31 derivative. pANL31 with 1440 kbp fragment containing the <i>NAR1</i> gene lacking stop codon fused in frame to the <i>eGFP</i> gene. Amp <sup>r</sup> , Zeo <sup>r</sup> .       | This work             |
| pEYFP-N1                        | Containing enhanced yellow fluorescent protein ( <i>EYFP</i> ) gene. Kan <sup>r</sup> ,Zeo <sup>r</sup> .                                                                               | Takara, EEUU          |
| pSSU2-YFP                       | pEYFP-N1 derivative. Used to SSU2- <i>EYFP</i> fusion. Kan <sup>r</sup> , Zeo <sup>r</sup> .                                                                                            | This work             |
| pGEMHE                          | Used in the synthesis of mRNA in <i>Xenopus</i> . Contains 1098 bp which are not transcribed at the 5' region                                                                           | (4)                   |

|            |                                                                                                                                                                               |           |
|------------|-------------------------------------------------------------------------------------------------------------------------------------------------------------------------------|-----------|
| pGEMT-SSU1 | (5'UTR) and 279 bp in the region 3'(3'UTR). Amp <sup>r</sup><br>pGEM-T Easy derivative containing 2.8 kpb<br>corresponding to <i>SSU1</i> . Amp <sup>r</sup>                  | This work |
| pssu1ΔURA3 | pGEMT-SSU1 derivative containing a deletion of 1642<br>pb and the <i>URA3</i> marker insertion. Amp <sup>r</sup> . <i>URA3</i> .                                              | This work |
| pGEMT-SSU2 | pGEM-T Easy derivative containing 2.8 kpb<br>corresponding to <i>SSU2</i> . Amp <sup>r</sup>                                                                                  | This work |
| pssu2Δble  | pGEMT-SSU2 derivative containing a deletion of 1599<br>pb and the <i>ble</i> marker insertion. Amp <sup>r</sup> . <i>ble</i> .                                                | This work |
| pNAR1      | pGEM-T Easy derivative. It carries a 2876 bp fragment<br>used to <i>NAR1</i> disruption with <i>URA3</i> or <i>LEU2</i> gene<br>marker. Amp <sup>r</sup> .                    | This work |
| pnar1Δ     | pNAR1 derivative containing the 1970 bp fragment used<br>to disruption with <i>URA3</i> gene marker. Amp <sup>r</sup> , <i>URA3</i> .                                         | This work |
| pSSU2-URA3 | pBSURA3 derivative containing 2.8 kpb of <i>SSU2</i> gene<br>(ORF plus 1008 pb and<br>682 pb from <i>SSU2</i> 5' and 3' non-coding región). Amp <sup>r</sup> ,<br><i>URA3</i> | This work |
| pSSU2-LEU2 | pGEMT-SSU2 derivative containing containing <i>H.</i><br><i>polymorpha</i> <i>LEU2</i> gene. Amp <sup>r</sup> . <i>LEU2</i> .                                                 | This work |
| pNAR1-LEU2 | pGEM-LEU2 derivative containing a 2492 bp <i>H.</i><br><i>polymorpha</i> <i>NAR1</i> fragment obtained from pGEM-<br>LEU2. Amp <sup>r</sup> .                                 | This work |

1. **Agaphonov MO, Poznyakovski AI, Bogdanova AI, Ter-Avanesyan MD.** 1994. Isolation and characterization of the *LEU2* gene of *Hansenula polymorpha*. Yeast. **10**:509-513.
2. **Leão-Helder AN, Krikken AM, van der Klei IJ, Kiel JKA W, Veenhuis M.** 2003. Transcriptional Down-regulation of Peroxisome Numbers Affects Selective Peroxisome Degradation in *Hansenula polymorpha*. J. Biol. Chem. **278**:40749-40756.
3. **Brito N, Pérez MD, Perdomo G, González C, García-Lugo P, Siverio JM.** 1999. A set of *Hansenula polymorpha* integrative vectors to construct *lacZ* fusions. Appl. Microbiol. Biotechnol. **53**:23-29.

4. **Liman ER, Tytgat J, Hess P.** 1992. Subunit stoichiometry of a mammalian K<sup>+</sup> channel determined by construction of multimeric cDNAs. *Neuron*. **9**:861-871.

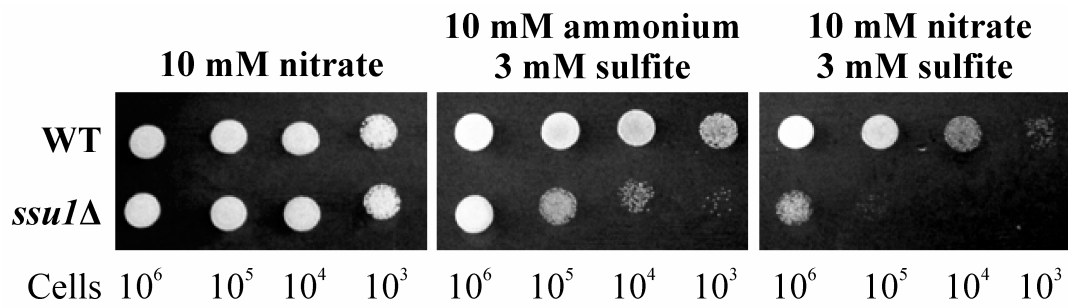

**FIG S1** Sensitivity to sulfite is increased when nitrate is added. Serial 10-fold dilutions of the indicated strains were spotted on synthetic medium buffered at pH 3.5 plus 10 mM nitrate, 5 mM ammonium plus 3 mM sulfite and 10 mM nitrate plus 3 mM sulfite and 1 mM proline. Cells were incubated at 37°C for 2 days.

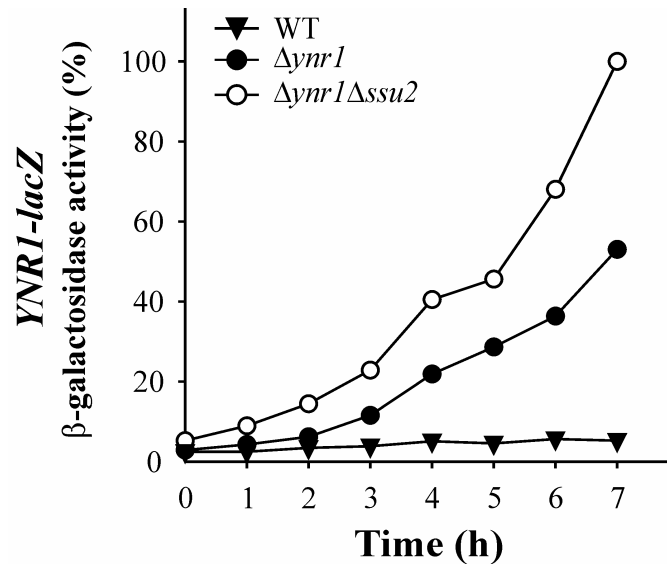

**FIG S2** *SSU2* deletion affects the expression levels of genes induced by nitrate. Ammonium-grown cells were resuspended and incubated in synthetic medium plus 1  $\mu$ M nitrate for 7 h. The experiments were repeated three times without significant differences; data from only one experiment are shown.



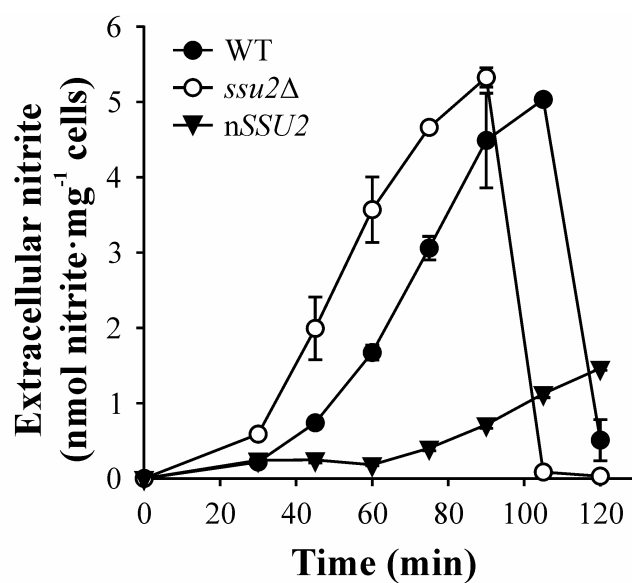

**FIG S3** Kinetic nitrite excretion in WT, *ssu2Δ* and *nSSU2*. Ammonium-grown cells were incubated in nitrogen free medium buffered at pH 5.5 for 120 min before to added 1 mM sodium nitrate. Data are expressed as mean values  $\pm$  S.E. from three independent experiments.

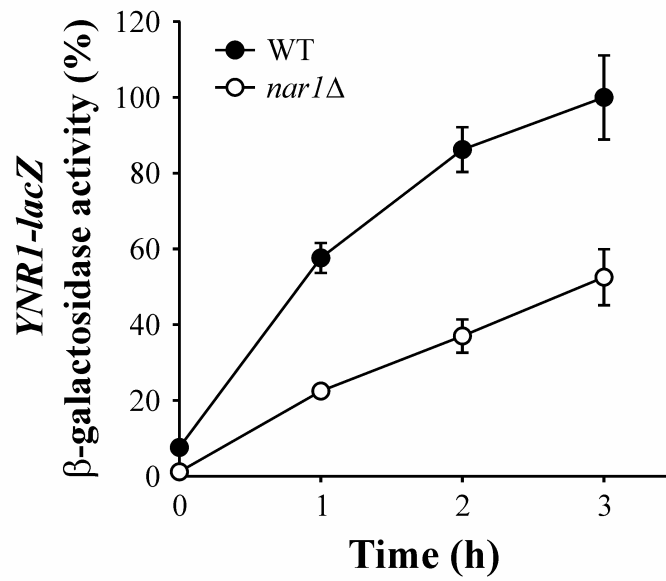

**FIG S4** Effect of *NAR1* deletion on *YNR1* expression. *YNR1* expression was followed by assaying  $\beta$ -galactosidase activity in WT and *nar1* $\Delta$  bearing *YNR1-lacZ*. Cells were grown in synthetic medium plus 5 mM ammonium at OD<sub>660</sub> of 2-3 and were resuspended in synthetic medium plus 5 mM nitrate for 3 hours. Values are expressed as percentage of  $\beta$ -galactosidase activity  $\pm$  S.E from three independent experiments.

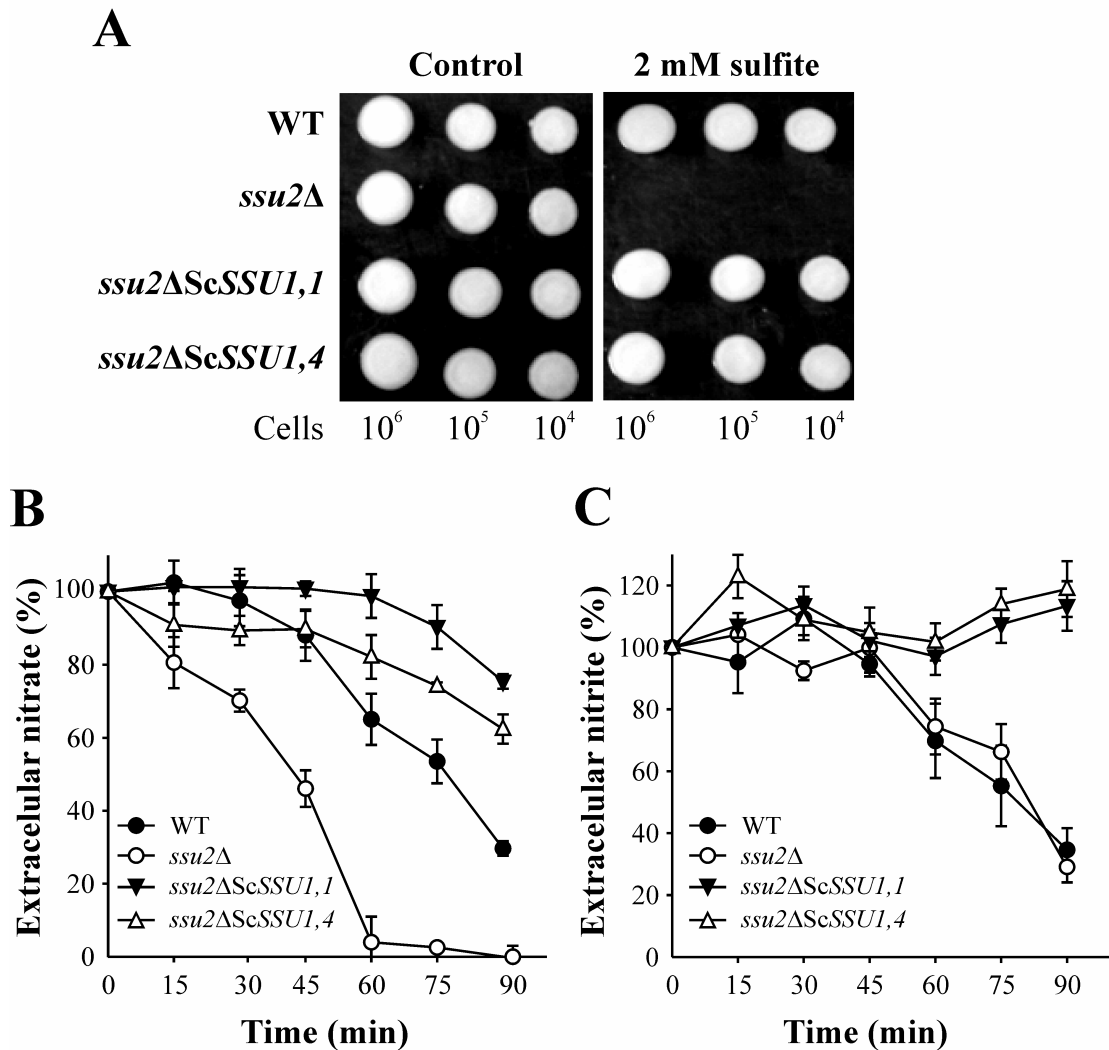

**FIG S5** ScSSU1 complements sulfite sensibility and nitrate and nitrite efflux in H*psu2Δ* expressing ScSSU1. (A) To determinate sulfite sensibility, cells were grown in YPD. Serial 10-fold dilutions were spotted on synthetic medium buffered at pH 3.5 containing 5 mM of ammonium and the sulfite concentration indicated. (B) Nitrate uptake. Cells were grown in 5 mM of ammonium, were nitrogen starved for 90 min in nitrogen free medium buffered to pH 5.5. Nitrate uptake rate assays were triggered with 0.5 mM nitrate. Values are expressed as percentage of extracellular nitrate  $\pm$  S.E. from three independent experiments. (C) Nitrite

uptake. Ammonium-grown cells were nitrogen starved for 90 min on pH 5.5 buffered synthetic medium. Nitrite uptake rate assays were triggered with 0.5 mM nitrite. Values are expressed as percentage of extracellular nitrite  $\pm$  S.E. from three independent experiments.

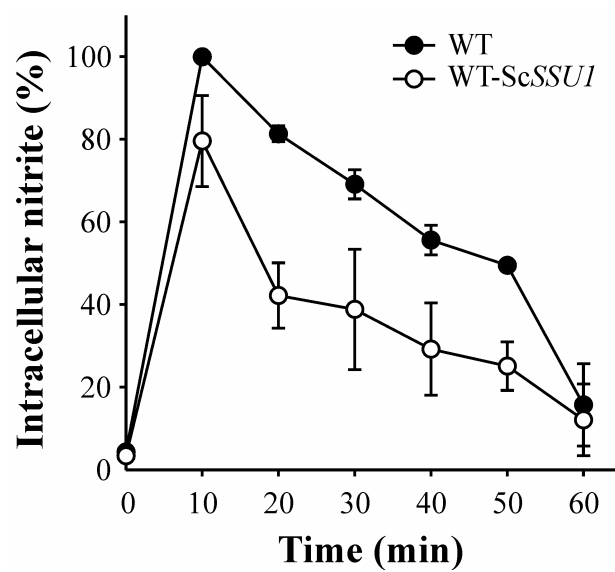

**FIG S6** WT expressing *ScSSUI* efflux nitrite faster than WT. Nitrite accumulations was determinate in ammonium-grown cells starved for 120 min in nitrogen free medium. Nitrite accumulation assays were triggered with 1 mM nitrite. Values are expressed as a percentage of intracellular nitrite  $\pm$  S.E. from three independent experiments.
